# Supplementary material for: Genome-wide gene-environment analyses of major depressive disorder and reported lifetime traumatic experiences in UK Biobank
Source: bioRxiv or medRxiv preprint supplement (doi:10.1101/247353), 2019-05-13

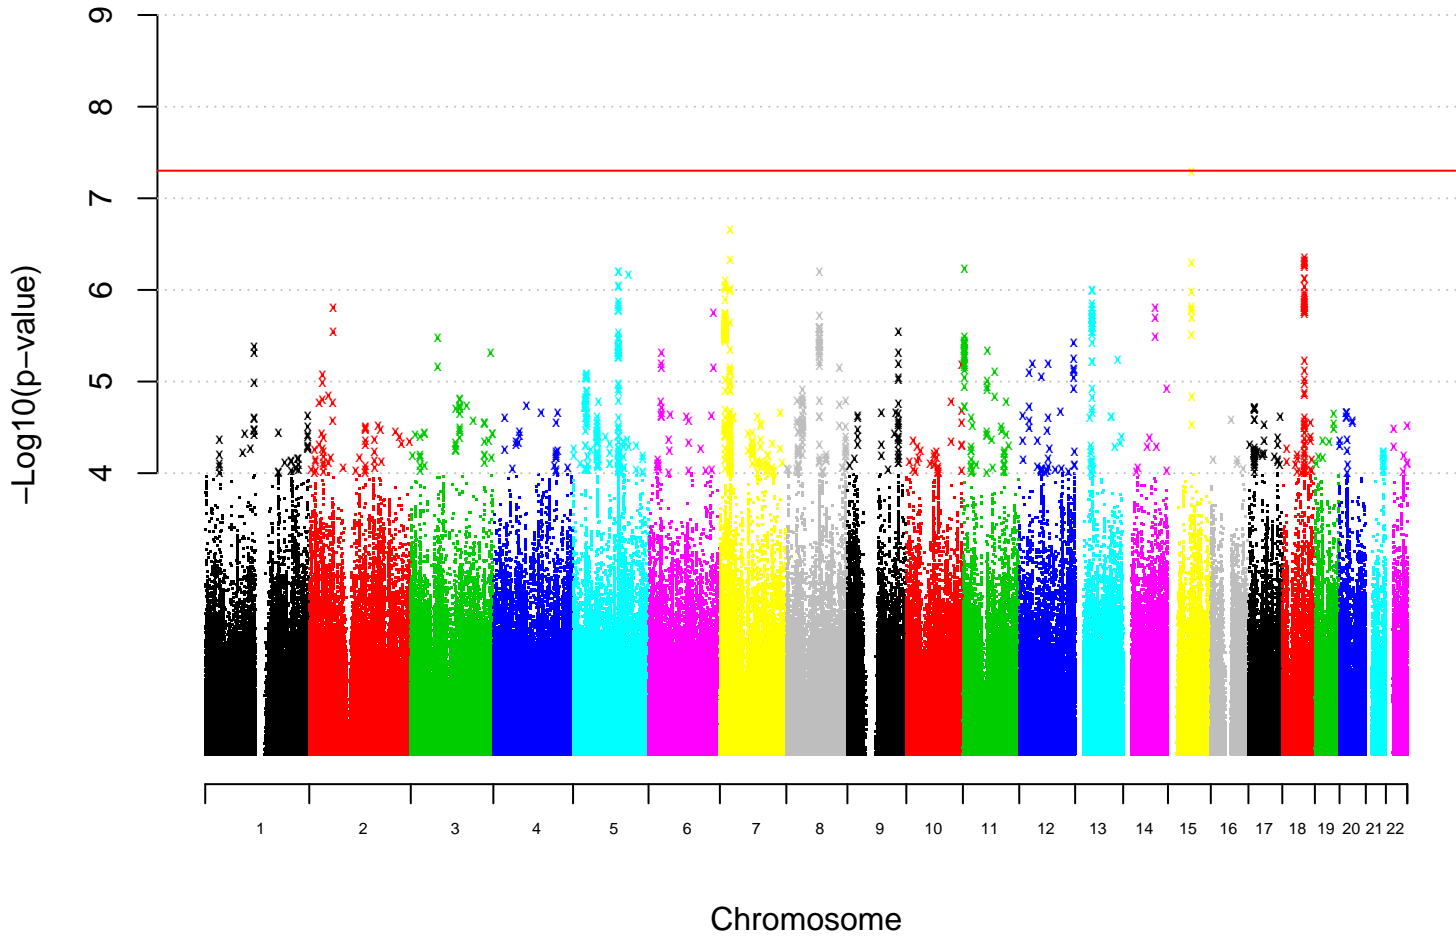

Supplement: Supplementary file [file 247353-8.pdf]
